# Supplementary material for: Inferring surface energy fluxes using drone data assimilation in large eddy simulations
Source: Copernicus journal article supplement (doi:10.5194/amt-2022-219), 2022-08-17
Supplement: Supplementary file 1 [file amt-2022-219-supplement.pdf]

# Supplementary material: Inferring surface energy fluxes using drone data assimilation in large eddy simulations

Norbert Pirk<sup>1</sup>, Kristoffer Aalstad<sup>1</sup>, Sebastian Westermann<sup>1</sup>, Astrid Vatne<sup>1</sup>, Alouette van Hove<sup>1</sup>, Lena Tallaksen<sup>1</sup>, Massimo Cassiani<sup>2</sup>, and Gabriel Katul<sup>3</sup>

<sup>1</sup>Department of Geosciences, University of Oslo, Sem Sælands vei 1, 0371 Oslo, Norway

<sup>2</sup>NILU - Norwegian Institute for Air Research, Instituttveien 18, 2007 Kjeller, Norway

<sup>3</sup>Department of Civil and Environmental Engineering, Duke University, 121 Hudson Hall, Durham, NC, 27708, USA

**Correspondence:** Norbert Pirk (norbert.pirk@geo.uio.no)

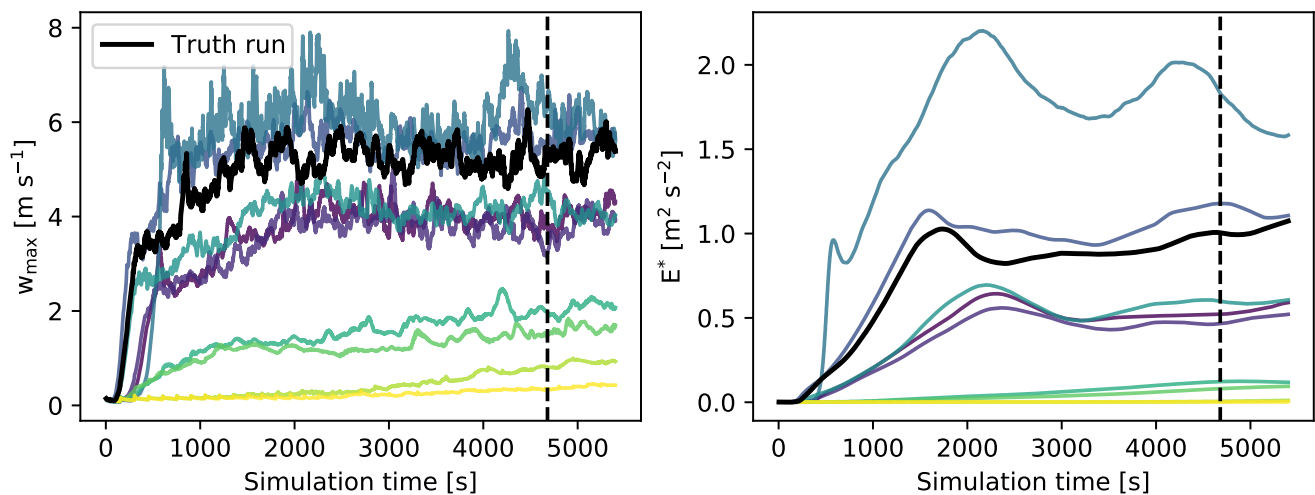

**Figure S1.** Time series of maximum vertical wind speed (left) and resolved-scale turbulence kinetic energy (right) for a subset of ensemble members and the truth run of our synthetic experiments. The first 4680 sec (dashed line) are regarded as the spin-up time and not used in the analysis.

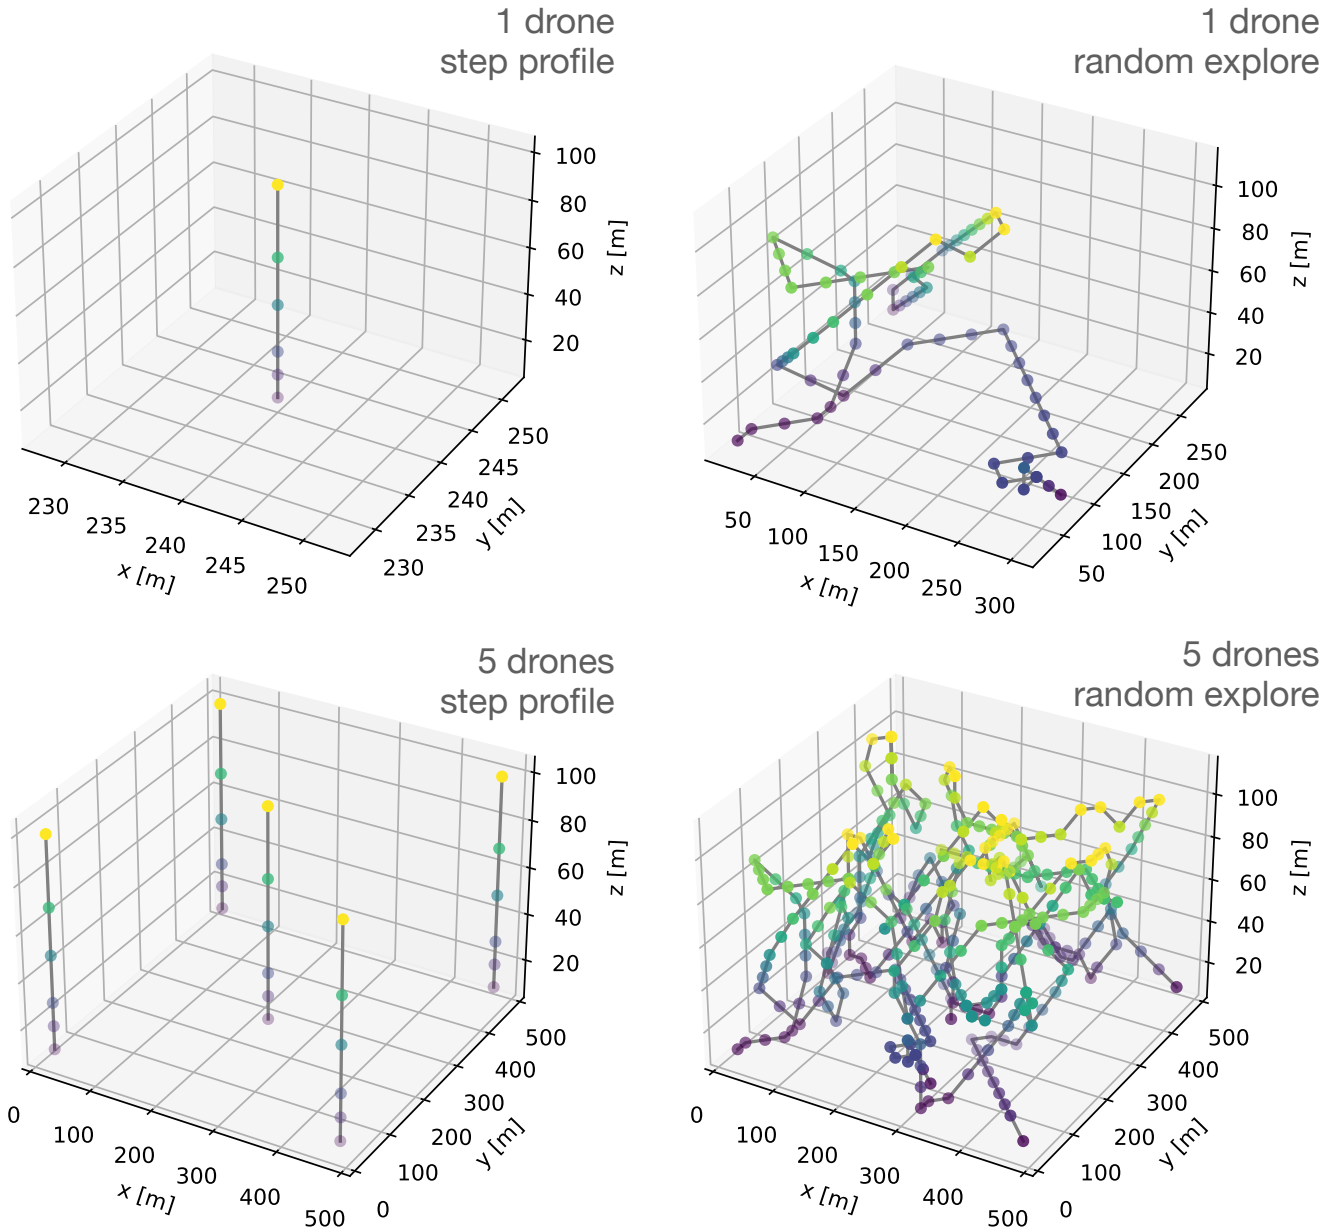

**Figure S2.** Examples of flight plans with measurement locations in the domain. For step profiles, drones stay at each location for two minutes to collect data. Random exploration flight plans allow drones to change location every 10 sec and are generated as bias random walks with a flight time of 12 min. The colors of the sampling points denote their altitude.

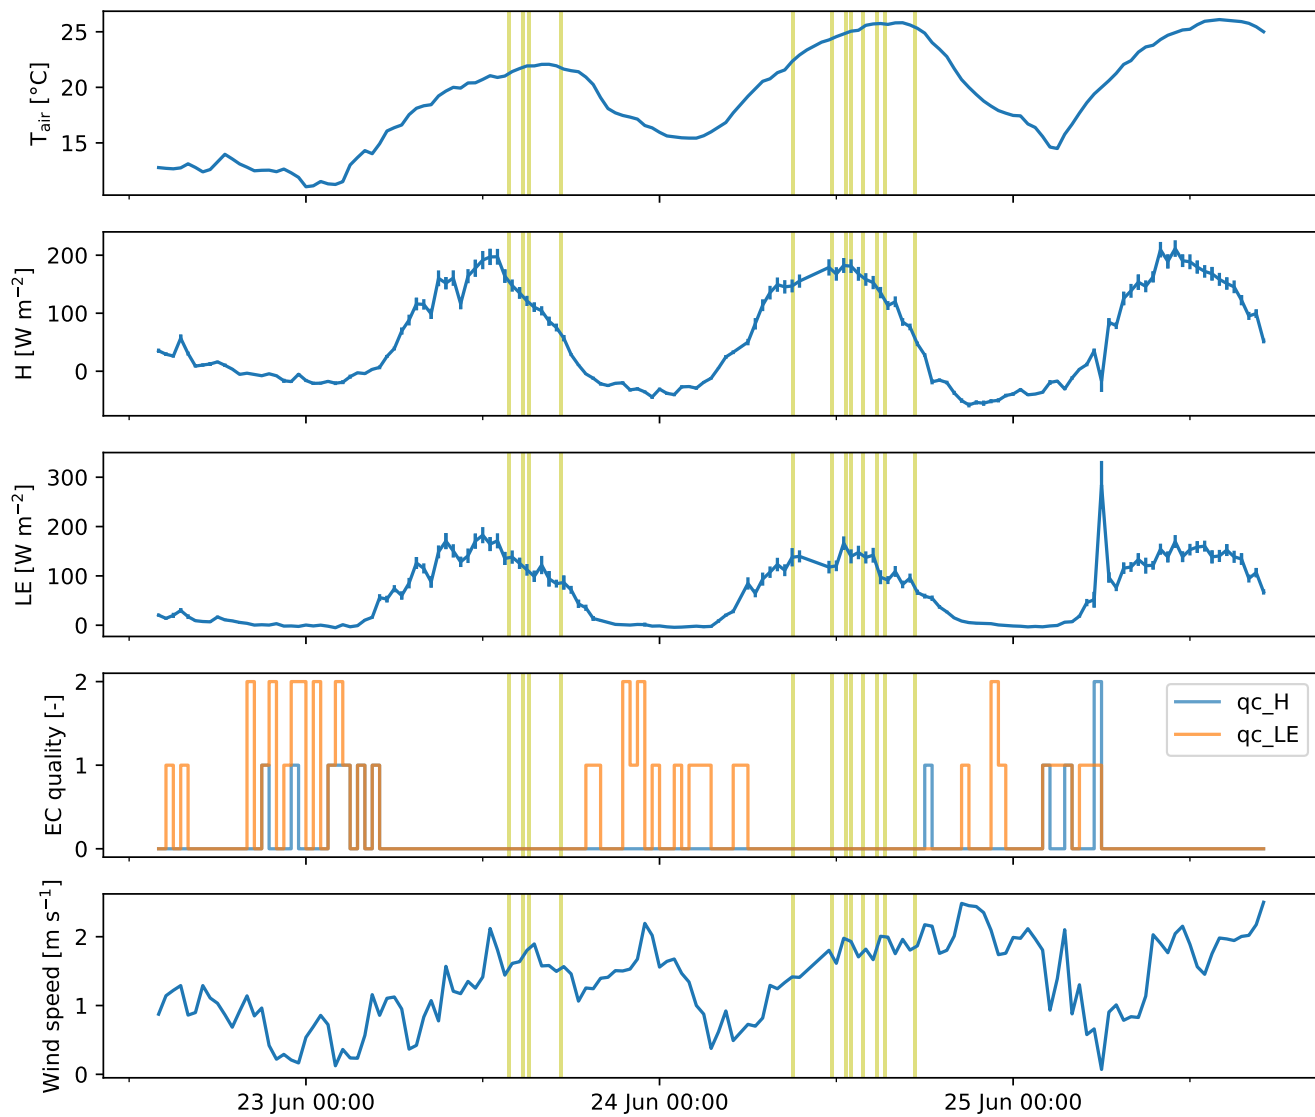

**Figure S3.** Campaign overview for our largest campaign featuring 12 successful flights (indicated as vertical yellow lines here) at the Hisåsen site. Error bars for  $H$  and  $LE$  indicate random flux uncertainty as estimated by EddyPro.
